# Supplementary material for: Artificial cerium-based proenzymes confined in lyotropic liquid crystals: synthetic strategy and on-demand activation
Source: Royal Society of Chemistry journal article supplement (doi:10.1039/c8tb00479j), 2018-01-01
Supplement: c8tb00479j1.pdf [file c8tb00479j1.pdf]

Electronic Supplementary Information

## Artificial cerium-based proenzymes confined in lyotropic liquid crystal: synthetic strategy and *on-demand* activation

Denise R. Bohn,<sup>a</sup> Francieli O. Lobato,<sup>a</sup> Alisson S. Thill,<sup>b</sup> Luiza Steffens,<sup>c</sup> Marco Raabe,<sup>c</sup> Bruna Donida,<sup>d</sup> Carmen R. Vargas,<sup>d</sup> Dinara J. Moura,<sup>c</sup> Fabiano Bernardi,<sup>\*b</sup> and Fernanda Poletto<sup>\*a</sup>

<sup>a</sup> Programa de Pós-Graduação em Química, Instituto de Química, Universidade Federal do Rio Grande do Sul (UFRGS), Porto Alegre/RS – Brazil. <sup>b</sup> Programa de Pós-Graduação em Física, Instituto de Física, Universidade Federal do Rio Grande do Sul (UFRGS), Porto Alegre/RS – Brazil <sup>c</sup> Laboratório de Genética Toxicológica, Universidade Federal de Ciências da Saúde de Porto Alegre (UFCSPA), Porto Alegre/RS – Brazil. <sup>d</sup> Programa de Pós-Graduação em Ciências Biológicas, Bioquímica, Universidade Federal do Rio Grande do Sul (UFRGS), Porto Alegre/RS – Brazil.

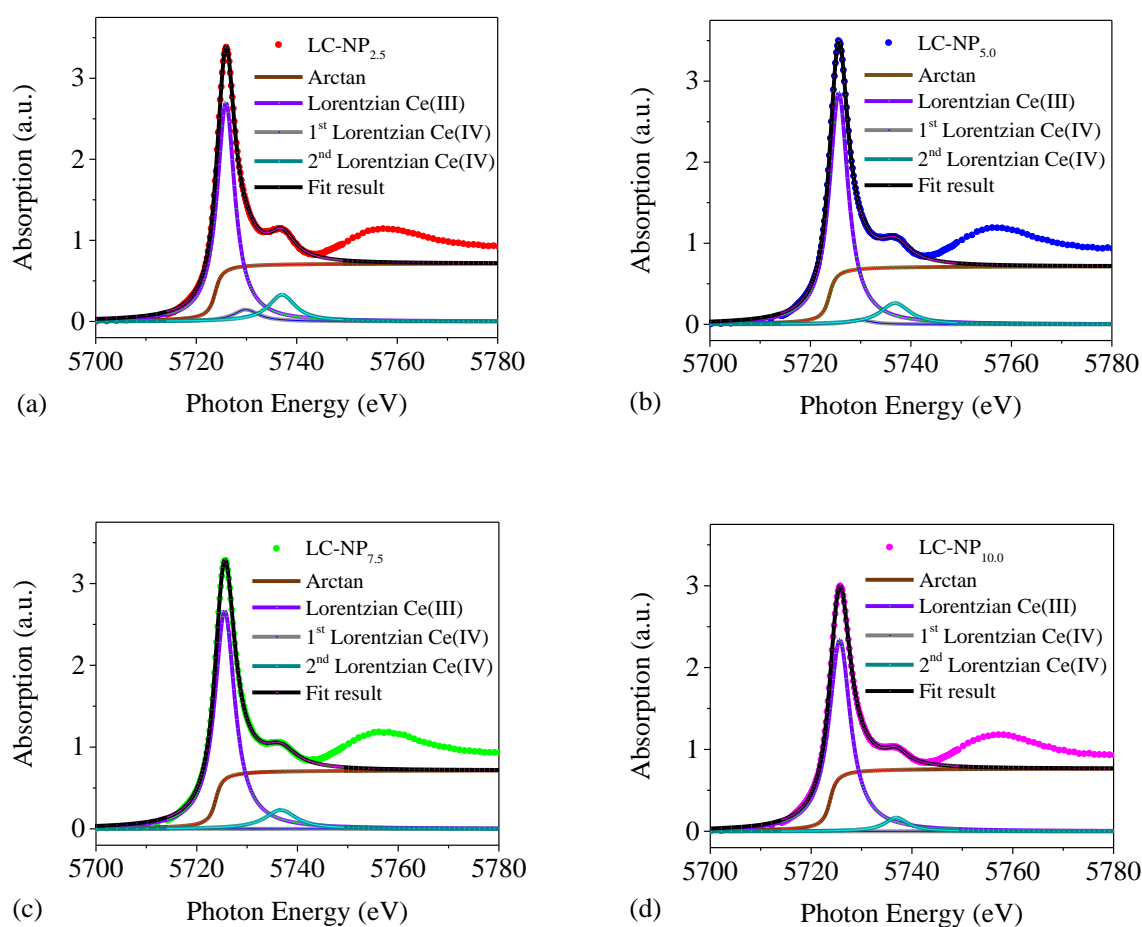

**Figure S1.** XANES spectra at the Ce L<sub>3</sub> edge for the as prepared samples (a) LC-NP<sub>2.5</sub>, (b) LC-NP<sub>5.0</sub>, (c) LC-NP<sub>7.5</sub>, and (d) LC-NP<sub>10.0</sub> (circles) and the corresponding functions used in the fitting procedure as well the fit result (solid lines).

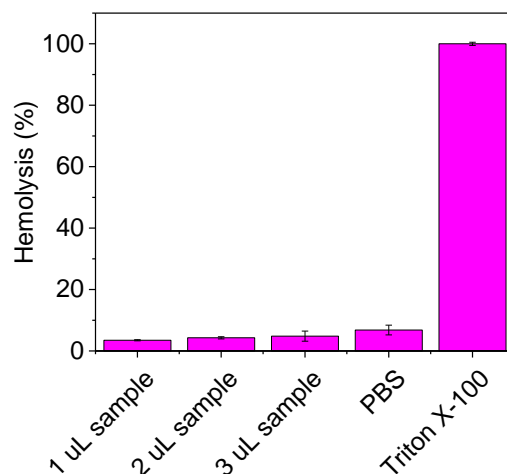

**Figure S2.** Hemoglobin release from human erythrocytes (100  $\mu\text{L}$  of fresh whole blood) after contact with an aqueous dispersion of LC-NP<sub>10.0</sub> (1, 2, and 3  $\mu\text{L}$  in 100  $\mu\text{L}$  PBS). The data were normalized to the hemoglobin release level promoted by the contact of blood with Triton X-100 as control. The experiments were made in triplicate.

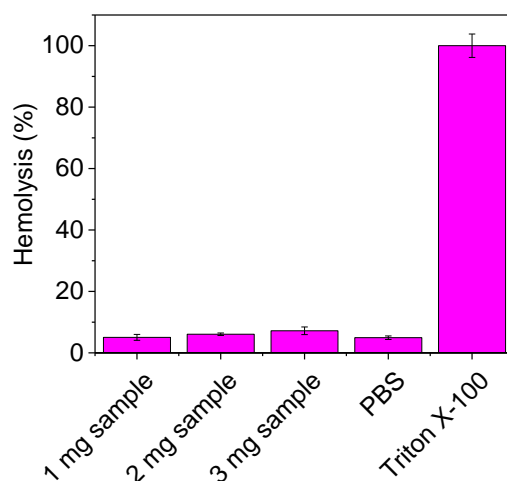

**Figure S3.** Hemoglobin release from human erythrocytes (100  $\mu\text{L}$  of fresh whole blood) after contact with ox-NP<sub>10.0</sub> (1, 2, and 3 mg in 100  $\mu\text{L}$  PBS). The data were normalized to the hemoglobin release level promoted by the contact of blood with Triton X-100 as control. The experiments were made in triplicate.
